# Supplementary material
Source: Springer Nature journal article supplement (https://www.springermedizin.de/resource/supplementary/13046_2010_297_MOESM5_ESM.pdf/9662062)

**Relative intensity**

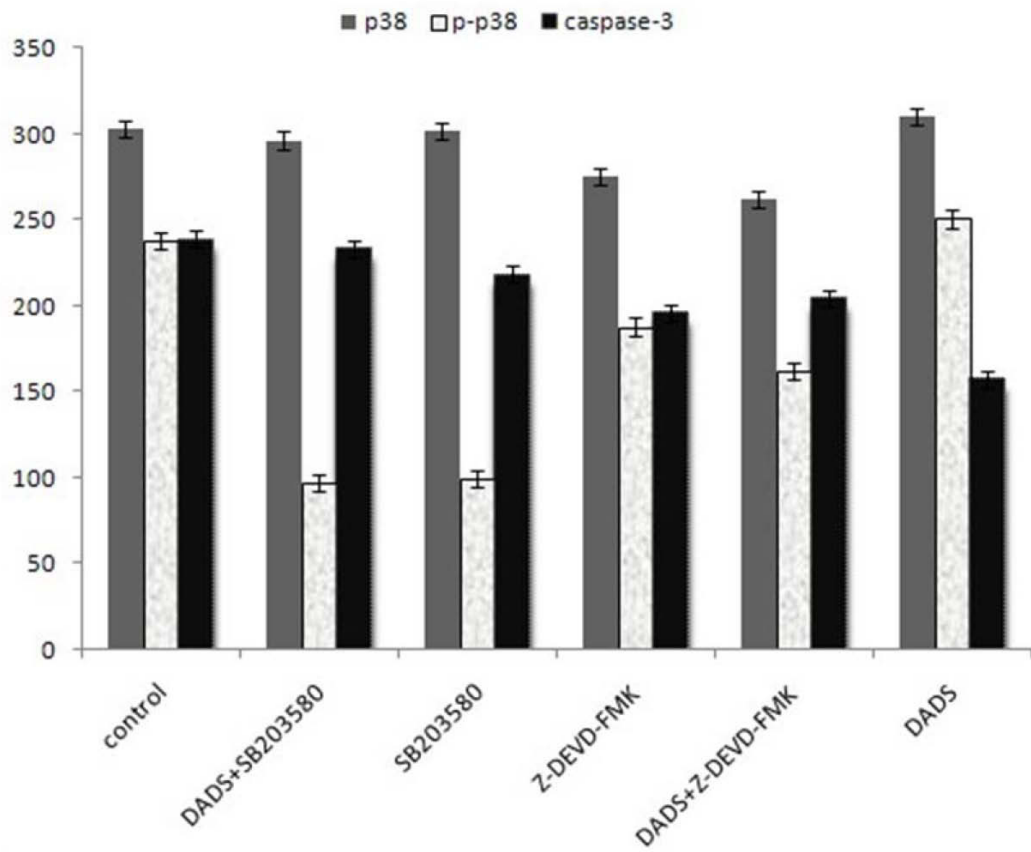

Supplement: MOESM5 [file 9662062]
